# Supplementary material
Source: Elsevier journal article supplement (https://www.sciencedirect.com/science/article/pii/S2530064418301378)
Supplement: mmc1 [file S2530064418301378:mmc1.xlsx]

## Sheet: Job.mamA - Spp x Model
Species	Species added as polytomies	Ensembled_TSS	Records in the Present	Records in the future (low concentration)	Records in the future (intermediate concentration)	Records in the future (high concentration)	Kingdom	Phylum	Class	Order	Family	Genus
Akodon_cursor	0	0.7011	941	320	196	21	ANIMALIA	CHORDATA	MAMMALIA	RODENTIA	CRICETIDAE	AKODON
Akodon_lindberghi	0	0.5827	155	24	22	0	ANIMALIA	CHORDATA	MAMMALIA	RODENTIA	CRICETIDAE	AKODON
Akodon_montensis	0	0.7817	377	113	82	10	ANIMALIA	CHORDATA	MAMMALIA	RODENTIA	CRICETIDAE	AKODON
Akodon_sanctipaulensis	0	0.5623	0	0	2	0	ANIMALIA	CHORDATA	MAMMALIA	RODENTIA	CRICETIDAE	AKODON
Akodon_serrensis	0	0.751	0	20	10	3	ANIMALIA	CHORDATA	MAMMALIA	RODENTIA	CRICETIDAE	AKODON
Alouatta_belzebul	0	0.6956	0	123	22	0	ANIMALIA	CHORDATA	MAMMALIA	PRIMATES	ATELIDAE	ALOUATTA
Alouatta_caraya	0	0.9133	2297	2360	2465	2449	ANIMALIA	CHORDATA	MAMMALIA	PRIMATES	ATELIDAE	ALOUATTA
Alouatta_discolor	1	0.5771	0	2	0	0	ANIMALIA	CHORDATA	MAMMALIA	RODENTIA	CRICETIDAE	ALOUATTA
Alouatta_guariba	0	0.7475	0	106	41	10	ANIMALIA	CHORDATA	MAMMALIA	PRIMATES	ATELIDAE	ALOUATTA
Alouatta_macconnelli	0	0.8521	0	77	23	0	ANIMALIA	CHORDATA	MAMMALIA	PRIMATES	ATELIDAE	ALOUATTA
Alouatta_puruensis	1	0.703	0	35	2	0	ANIMALIA	CHORDATA	MAMMALIA	PRIMATES	ATELIDAE	ALOUATTA
Alouatta_sara	0	0.8432	0	251	406	207	ANIMALIA	CHORDATA	MAMMALIA	PRIMATES	ATELIDAE	ALOUATTA
Alouatta_ululata	1	0.8491	379	653	317	341	ANIMALIA	CHORDATA	MAMMALIA	PRIMATES	ATELIDAE	ALOUATTA
Aotus_azarae	0	0.8715	1412	1503	1510	1182	ANIMALIA	CHORDATA	MAMMALIA	PRIMATES	AOTIDAE	AOTUS
Aotus_nigriceps	0	0.7414	0	41	5	0	ANIMALIA	CHORDATA	MAMMALIA	PRIMATES	AOTIDAE	AOTUS
Aotus_trivirgatus	0	0.8567	0	75	44	2	ANIMALIA	CHORDATA	MAMMALIA	PRIMATES	AOTIDAE	AOTUS
Ateles_chamek	0	0.8806	0	52	21	0	ANIMALIA	CHORDATA	MAMMALIA	PRIMATES	ATELIDAE	ATELES
Ateles_marginatus	0	0.6129	0	16	1	0	ANIMALIA	CHORDATA	MAMMALIA	PRIMATES	ATELIDAE	ATELES
Ateles_paniscus	0	0.8148	0	49	1	0	ANIMALIA	CHORDATA	MAMMALIA	PRIMATES	ATELIDAE	ATELES
Bassaricyon_beddardi	0	0.7615	0	1	0	0	ANIMALIA	CHORDATA	MAMMALIA	CARNIVORA	PROCYONIDAE	BASSARICYON
Bibimys_labiosus	0	0.77	133	60	17	6	ANIMALIA	CHORDATA	MAMMALIA	RODENTIA	CRICETIDAE	BIBIMYS
Blarinomys_breviceps	0	0.6988	0	253	113	31	ANIMALIA	CHORDATA	MAMMALIA	RODENTIA	CRICETIDAE	BLARINOMYS
Blastocerus_dichotomus	0	0.8543	2425	1447	1513	766	ANIMALIA	CHORDATA	MAMMALIA	CETARTIODACTYLA	CERVIDAE	BLASTOCERUS
Brachyteles_hypoxanthus	0	0.7815	0	359	62	106	ANIMALIA	CHORDATA	MAMMALIA	PRIMATES	ATELIDAE	BRACHYTELES
Bradypus_torquatus	0	0.641	0	1	0	0	ANIMALIA	CHORDATA	MAMMALIA	PILOSA	BRADYPODIDAE	BRADYPUS
Bradypus_tridactylus	0	0.6912	0	107	66	0	ANIMALIA	CHORDATA	MAMMALIA	PILOSA	BRADYPODIDAE	BRADYPUS
Bradypus_variegatus	0	0.9427	2345	1940	1956	1527	ANIMALIA	CHORDATA	MAMMALIA	PILOSA	BRADYPODIDAE	BRADYPUS
Brucepattersonius_igniventris	1	0.7101	0	24	10	2	ANIMALIA	CHORDATA	MAMMALIA	RODENTIA	CRICETIDAE	BRUCEPATTERSONIUS
Brucepattersonius_soricinus	1	0.7285	0	19	7	3	ANIMALIA	CHORDATA	MAMMALIA	RODENTIA	CRICETIDAE	BRUCEPATTERSONIUS
Cabassous_tatouay	0	0.6847	1386	859	542	98	ANIMALIA	CHORDATA	MAMMALIA	CINGULATA	DASYPODIDAE	CABASSOUS
Cabassous_unicinctus	0	0.9337	2228	1826	1645	1341	ANIMALIA	CHORDATA	MAMMALIA	CINGULATA	DASYPODIDAE	CABASSOUS
Callicebus_brunneus	0	0.7496	0	48	50	0	ANIMALIA	CHORDATA	MAMMALIA	PRIMATES	PITHECIIDAE	CALLICEBUS
Callicebus_coimbrai	1	0.7886	0	3	1	1	ANIMALIA	CHORDATA	MAMMALIA	PRIMATES	PITHECIIDAE	CALLICEBUS
Callicebus_donacophilus	0	0.8583	0	724	947	755	ANIMALIA	CHORDATA	MAMMALIA	PRIMATES	PITHECIIDAE	CALLICEBUS
Callicebus_dubius	0	0.7769	0	27	0	0	ANIMALIA	CHORDATA	MAMMALIA	PRIMATES	PITHECIIDAE	CALLICEBUS
Callicebus_hoffmannsi	0	0.6303	0	5	0	0	ANIMALIA	CHORDATA	MAMMALIA	PRIMATES	PITHECIIDAE	CALLICEBUS
Callicebus_moloch	0	0.6285	0	65	3	0	ANIMALIA	CHORDATA	MAMMALIA	PRIMATES	PITHECIIDAE	CALLICEBUS
Callicebus_nigrifrons	0	0.7937	804	651	350	124	ANIMALIA	CHORDATA	MAMMALIA	PRIMATES	PITHECIIDAE	CALLICEBUS
Callicebus_pallescens	0	0.9495	0	144	92	165	ANIMALIA	CHORDATA	MAMMALIA	PRIMATES	PITHECIIDAE	CALLICEBUS
Callicebus_personatus	0	0.738	406	163	125	78	ANIMALIA	CHORDATA	MAMMALIA	PRIMATES	PITHECIIDAE	CALLICEBUS
Callithrix_aurita	0	0.6848	0	37	20	0	ANIMALIA	CHORDATA	MAMMALIA	PRIMATES	CALLITRICHIDAE	CALLITHRIX
Callithrix_flaviceps	0	0.581	0	6	0	0	ANIMALIA	CHORDATA	MAMMALIA	PRIMATES	CALLITRICHIDAE	CALLITHRIX
Callithrix_geoffroyi	0	0.8157	247	119	33	2	ANIMALIA	CHORDATA	MAMMALIA	PRIMATES	CALLITRICHIDAE	CALLITHRIX
Callithrix_jacchus	0	0.8832	1122	883	581	475	ANIMALIA	CHORDATA	MAMMALIA	PRIMATES	CALLITRICHIDAE	CALLITHRIX
Callithrix_penicillata	0	0.8109	2300	1791	1304	851	ANIMALIA	CHORDATA	MAMMALIA	PRIMATES	CALLITRICHIDAE	CALLITHRIX
Calomys_callosus	0	0.8637	1793	1760	1356	426	ANIMALIA	CHORDATA	MAMMALIA	RODENTIA	CRICETIDAE	CALOMYS
Calomys_expulsus	0	0.8605	1162	872	713	411	ANIMALIA	CHORDATA	MAMMALIA	RODENTIA	CRICETIDAE	CALOMYS
Calomys_hummelincki	0	0.6778	0	99	6	0	ANIMALIA	CHORDATA	MAMMALIA	RODENTIA	CRICETIDAE	CALOMYS
Calomys_laucha	0	0.9252	0	4	0	0	ANIMALIA	CHORDATA	MAMMALIA	RODENTIA	CRICETIDAE	CALOMYS
Calomys_tener	0	0.7662	1683	1370	1146	914	ANIMALIA	CHORDATA	MAMMALIA	RODENTIA	CRICETIDAE	CALOMYS
Calomys_tocantinsi	1	0.7792	172	227	143	125	ANIMALIA	CHORDATA	MAMMALIA	RODENTIA	CRICETIDAE	CALOMYS
Caluromys_lanatus	0	0.8266	791	396	188	22	ANIMALIA	CHORDATA	MAMMALIA	DIDELPHIMORPHIA	DIDELPHIDAE	CALUROMYS
Caluromys_philander	0	0.894	2630	2391	2330	1455	ANIMALIA	CHORDATA	MAMMALIA	DIDELPHIMORPHIA	DIDELPHIDAE	CALUROMYS
Caluromysiops_irrupta	0	0.6869	0	19	28	0	ANIMALIA	CHORDATA	MAMMALIA	DIDELPHIMORPHIA	DIDELPHIDAE	CALUROMYSIOPS
Carterodon_sulcidens	0	0.8185	838	871	585	409	ANIMALIA	CHORDATA	MAMMALIA	RODENTIA	ECHIMYIDAE	CARTERODON
Cavia_aperea	0	0.8522	2452	1812	1314	841	ANIMALIA	CHORDATA	MAMMALIA	RODENTIA	CAVIIDAE	CAVIA
Cavia_fulgida	0	0.5834	0	110	21	0	ANIMALIA	CHORDATA	MAMMALIA	RODENTIA	CAVIIDAE	CAVIA
Cebus_apella	0	0.8794	394	260	225	104	ANIMALIA	CHORDATA	MAMMALIA	PRIMATES	CEBIDAE	CEBUS
Cebus_cay	1	0.9089	166	153	131	188	ANIMALIA	CHORDATA	MAMMALIA	PRIMATES	CEBIDAE	CEBUS
Cebus_flavius	1	0.7586	0	17	9	9	ANIMALIA	CHORDATA	MAMMALIA	PRIMATES	CEBIDAE	CEBUS
Cebus_kaapori	1	0.5685	0	10	8	0	ANIMALIA	CHORDATA	MAMMALIA	PRIMATES	CEBIDAE	CEBUS
Cebus_libidinosus	0	0.9239	2365	2238	2152	1735	ANIMALIA	CHORDATA	MAMMALIA	PRIMATES	CEBIDAE	CEBUS
Cebus_nigritus	0	0.8417	0	117	109	10	ANIMALIA	CHORDATA	MAMMALIA	PRIMATES	CEBIDAE	CEBUS
Cebus_olivaceus	0	0.816	0	92	56	0	ANIMALIA	CHORDATA	MAMMALIA	PRIMATES	CEBIDAE	CEBUS
Cebus_robustus	1	0.8166	225	114	27	3	ANIMALIA	CHORDATA	MAMMALIA	PRIMATES	CEBIDAE	CEBUS
Cebus_xanthosternos	0	0.8265	0	139	63	18	ANIMALIA	CHORDATA	MAMMALIA	PRIMATES	CEBIDAE	CEBUS
Cerdocyon_thous	0	0.9287	2570	2604	2620	2515	ANIMALIA	CHORDATA	MAMMALIA	CARNIVORA	CANIDAE	CERDOCYON
Cerradomys_maracajuensis	1	0.8991	1003	1090	1010	1274	ANIMALIA	CHORDATA	MAMMALIA	RODENTIA	CRICETIDAE	CERRADOMYS
Cerradomys_marinhus	1	0.4996	237	86	6	0	ANIMALIA	CHORDATA	MAMMALIA	RODENTIA	CRICETIDAE	CERRADOMYS
Cerradomys_scotti	1	0.6907	1773	1567	1178	424	ANIMALIA	CHORDATA	MAMMALIA	RODENTIA	CRICETIDAE	CERRADOMYS
Cerradomys_subflavus	0	0.892	1380	1190	1070	964	ANIMALIA	CHORDATA	MAMMALIA	RODENTIA	CRICETIDAE	CERRADOMYS
Chironectes_minimus	0	0.8962	558	151	85	7	ANIMALIA	CHORDATA	MAMMALIA	DIDELPHIMORPHIA	DIDELPHIDAE	CHIRONECTES
Chiropotes_albinasus	0	0.6607	0	44	10	0	ANIMALIA	CHORDATA	MAMMALIA	PRIMATES	PITHECIIDAE	CHIROPOTES
Chiropotes_chiropotes	0	0.8606	0	101	59	2	ANIMALIA	CHORDATA	MAMMALIA	PRIMATES	PITHECIIDAE	CHIROPOTES
Chiropotes_satanas	0	0.6082	0	144	28	0	ANIMALIA	CHORDATA	MAMMALIA	PRIMATES	PITHECIIDAE	CHIROPOTES
Chiropotes_utahickae	0	0.5789	0	6	1	0	ANIMALIA	CHORDATA	MAMMALIA	PRIMATES	PITHECIIDAE	CHIROPOTES
Choloepus_hoffmanni	0	0.7845	0	2	1	0	ANIMALIA	CHORDATA	MAMMALIA	PILOSA	MEGALONYCHIDAE	CHOLOEPUS
Chrysocyon_brachyurus	0	0.8285	2355	2188	2240	1912	ANIMALIA	CHORDATA	MAMMALIA	CARNIVORA	CANIDAE	CHRYSOCYON
Clyomys_bishopi	0	0.652	107	32	16	0	ANIMALIA	CHORDATA	MAMMALIA	RODENTIA	ECHIMYIDAE	CLYOMYS
Clyomys_laticeps	0	0.7399	1665	1144	568	286	ANIMALIA	CHORDATA	MAMMALIA	RODENTIA	ECHIMYIDAE	CLYOMYS
Coendou_bicolor	0	0.9296	0	15	1	0	ANIMALIA	CHORDATA	MAMMALIA	RODENTIA	ERETHIZONTIDAE	COENDOU
Coendou_nycthemera	0	0.6141	0	37	11	0	ANIMALIA	CHORDATA	MAMMALIA	RODENTIA	ERETHIZONTIDAE	COENDOU
Coendou_prehensilis	0	0.9275	2635	2630	2623	2170	ANIMALIA	CHORDATA	MAMMALIA	RODENTIA	ERETHIZONTIDAE	COENDOU
Conepatus_chinga	0	0.8506	0	60	38	40	ANIMALIA	CHORDATA	MAMMALIA	CARNIVORA	MEPHITIDAE	CONEPATUS
Conepatus_semistriatus	0	0.908	629	592	427	424	ANIMALIA	CHORDATA	MAMMALIA	CARNIVORA	MEPHITIDAE	CONEPATUS
Cryptonanus_agricolai	0	0.896	1041	689	516	306	ANIMALIA	CHORDATA	MAMMALIA	DIDELPHIMORPHIA	DIDELPHIDAE	CRYPTONANUS
Cryptonanus_chacoensis	1	0.9701	0	45	48	56	ANIMALIA	CHORDATA	MAMMALIA	DIDELPHIMORPHIA	DIDELPHIDAE	CRYPTONANUS
Ctenomys_boliviensis	0	0.8148	794	1038	1121	729	ANIMALIA	CHORDATA	MAMMALIA	RODENTIA	CTENOMYIDAE	CTENOMYS
Ctenomys_brasiliensis	0	0.6777	0	468	157	31	ANIMALIA	CHORDATA	MAMMALIA	RODENTIA	CTENOMYIDAE	CTENOMYS
Ctenomys_minutus	0	0.91	0	245	169	240	ANIMALIA	CHORDATA	MAMMALIA	RODENTIA	CTENOMYIDAE	CTENOMYS
Cuniculus_paca	0	0.9531	2689	2488	2455	2194	ANIMALIA	CHORDATA	MAMMALIA	RODENTIA	CUNICULIDAE	CUNICULUS
Cyclopes_didactylus	0	0.9433	0	182	134	62	ANIMALIA	CHORDATA	MAMMALIA	PILOSA	CYCLOPEDIDAE	CYCLOPES
Dactylomys_boliviensis	0	0.7986	0	1	5	0	ANIMALIA	CHORDATA	MAMMALIA	RODENTIA	ECHIMYIDAE	DACTYLOMYS
Dactylomys_dactylinus	0	0.7679	281	48	18	0	ANIMALIA	CHORDATA	MAMMALIA	RODENTIA	ECHIMYIDAE	DACTYLOMYS
Dasyprocta_azarae	0	0.7086	1095	300	184	129	ANIMALIA	CHORDATA	MAMMALIA	RODENTIA	DASYPROCTIDAE	DASYPROCTA
Dasyprocta_cristata	0	0.6953	0	67	26	0	ANIMALIA	CHORDATA	MAMMALIA	RODENTIA	DASYPROCTIDAE	DASYPROCTA
Dasyprocta_leporina	0	0.8754	0	244	148	39	ANIMALIA	CHORDATA	MAMMALIA	RODENTIA	DASYPROCTIDAE	DASYPROCTA
Dasyprocta_prymnolopha	0	0.8926	0	1275	967	811	ANIMALIA	CHORDATA	MAMMALIA	RODENTIA	DASYPROCTIDAE	DASYPROCTA
Dasyprocta_punctata	0	0.7235	0	1022	1217	1134	ANIMALIA	CHORDATA	MAMMALIA	RODENTIA	DASYPROCTIDAE	DASYPROCTA
Dasypus_kappleri	0	0.8961	0	60	61	0	ANIMALIA	CHORDATA	MAMMALIA	CINGULATA	DASYPODIDAE	DASYPUS
Dasypus_novemcinctus	0	0.9549	2721	2721	2721	2721	ANIMALIA	CHORDATA	MAMMALIA	CINGULATA	DASYPODIDAE	DASYPUS
Dasypus_septemcinctus	0	0.7774	2721	2348	2165	1093	ANIMALIA	CHORDATA	MAMMALIA	CINGULATA	DASYPODIDAE	DASYPUS
Delomys_collinus	0	0.6479	0	47	16	0	ANIMALIA	CHORDATA	MAMMALIA	RODENTIA	CRICETIDAE	DELOMYS
Delomys_dorsalis	0	0.8138	0	4	1	0	ANIMALIA	CHORDATA	MAMMALIA	RODENTIA	CRICETIDAE	DELOMYS
Delomys_sublineatus	0	0.6054	0	129	20	0	ANIMALIA	CHORDATA	MAMMALIA	RODENTIA	CRICETIDAE	DELOMYS
Didelphis_albiventris	0	0.9327	2360	1992	1722	1693	ANIMALIA	CHORDATA	MAMMALIA	DIDELPHIMORPHIA	DIDELPHIDAE	DIDELPHIS
Didelphis_aurita	0	0.7949	369	174	99	14	ANIMALIA	CHORDATA	MAMMALIA	DIDELPHIMORPHIA	DIDELPHIDAE	DIDELPHIS
Didelphis_marsupialis	0	0.9697	1078	759	800	728	ANIMALIA	CHORDATA	MAMMALIA	DIDELPHIMORPHIA	DIDELPHIDAE	DIDELPHIS
Echimys_chrysurus	0	0.6888	0	60	8	0	ANIMALIA	CHORDATA	MAMMALIA	RODENTIA	ECHIMYIDAE	ECHIMYS
Eira_barbara	0	0.9444	2708	2688	2688	2720	ANIMALIA	CHORDATA	MAMMALIA	CARNIVORA	MUSTELIDAE	EIRA
Euphractus_sexcinctus	0	0.8256	2721	2614	2536	1887	ANIMALIA	CHORDATA	MAMMALIA	CINGULATA	DASYPODIDAE	EUPHRACTUS
Euryoryzomys_emmonsae	1	0.5267	0	13	1	0	ANIMALIA	CHORDATA	MAMMALIA	RODENTIA	CRICETIDAE	EURYORYZOMYS
Euryoryzomys_lamia	0	0.7021	1007	1021	645	247	ANIMALIA	CHORDATA	MAMMALIA	RODENTIA	CRICETIDAE	EURYORYZOMYS
Euryoryzomys_macconnelli	0	0.8036	0	10	0	0	ANIMALIA	CHORDATA	MAMMALIA	RODENTIA	CRICETIDAE	EURYORYZOMYS
Euryoryzomys_nitidus	0	0.7125	0	28	56	1	ANIMALIA	CHORDATA	MAMMALIA	RODENTIA	CRICETIDAE	EURYORYZOMYS
Euryoryzomys_russatus	0	0.7592	255	132	48	23	ANIMALIA	CHORDATA	MAMMALIA	RODENTIA	CRICETIDAE	EURYORYZOMYS
Euryzygomatomys_spinosus	0	0.7886	123	68	44	5	ANIMALIA	CHORDATA	MAMMALIA	RODENTIA	ECHIMYIDAE	EURYZYGOMATOMYS
Galea_flavidens	0	0.8394	866	1257	821	577	ANIMALIA	CHORDATA	MAMMALIA	RODENTIA	CAVIIDAE	GALEA
Galea_spixii	0	0.9183	2162	2320	2260	2111	ANIMALIA	CHORDATA	MAMMALIA	RODENTIA	CAVIIDAE	GALEA
Galictis_cuja	0	0.921	189	151	141	122	ANIMALIA	CHORDATA	MAMMALIA	CARNIVORA	MUSTELIDAE	GALICTIS
Galictis_vittata	0	0.9768	1419	1261	1171	991	ANIMALIA	CHORDATA	MAMMALIA	CARNIVORA	MUSTELIDAE	GALICTIS
Gracilinanus_agilis	0	0.9095	2433	2483	2410	2324	ANIMALIA	CHORDATA	MAMMALIA	DIDELPHIMORPHIA	DIDELPHIDAE	GRACILINANUS
Gracilinanus_emiliae	0	0.7252	0	82	10	0	ANIMALIA	CHORDATA	MAMMALIA	DIDELPHIMORPHIA	DIDELPHIDAE	GRACILINANUS
Gracilinanus_microtarsus	0	0.8263	348	111	62	10	ANIMALIA	CHORDATA	MAMMALIA	DIDELPHIMORPHIA	DIDELPHIDAE	GRACILINANUS
Graomys_griseoflavus	0	0.9628	0	30	9	25	ANIMALIA	CHORDATA	MAMMALIA	RODENTIA	CRICETIDAE	GRAOMYS
Holochilus_brasiliensis	0	0.8035	614	228	127	27	ANIMALIA	CHORDATA	MAMMALIA	RODENTIA	CRICETIDAE	HOLOCHILUS
Holochilus_sciureus	0	0.9699	1797	1752	1721	1613	ANIMALIA	CHORDATA	MAMMALIA	RODENTIA	CRICETIDAE	HOLOCHILUS
Hydrochoerus_hydrochaeris	0	0.9351	2527	2247	2179	1515	ANIMALIA	CHORDATA	MAMMALIA	RODENTIA	CAVIIDAE	HYDROCHOERUS
Hylaeamys_acritus	1	0.75	0	234	131	47	ANIMALIA	CHORDATA	MAMMALIA	RODENTIA	CRICETIDAE	HYLAEAMYS
Hylaeamys_laticeps	0	0.6231	0	128	35	10	ANIMALIA	CHORDATA	MAMMALIA	RODENTIA	CRICETIDAE	HYLAEAMYS
Hylaeamys_megacephalus	0	0.8519	2177	1561	1216	708	ANIMALIA	CHORDATA	MAMMALIA	RODENTIA	CRICETIDAE	HYLAEAMYS
Hylaeamys_oniscus	1	0.6865	0	13	2	0	ANIMALIA	CHORDATA	MAMMALIA	RODENTIA	CRICETIDAE	HYLAEAMYS
Hylaeamys_yunganus	0	0.8223	0	42	1	0	ANIMALIA	CHORDATA	MAMMALIA	RODENTIA	CRICETIDAE	HYLAEAMYS
Isothrix_bistriata	0	0.7004	108	3	3	0	ANIMALIA	CHORDATA	MAMMALIA	RODENTIA	ECHIMYIDAE	ISOTHRIX
Juliomys_pictipes	0	0.7952	0	59	20	8	ANIMALIA	CHORDATA	MAMMALIA	RODENTIA	CRICETIDAE	JULIOMYS
Juliomys_rimofrons	1	0.5588	0	1	4	0	ANIMALIA	CHORDATA	MAMMALIA	RODENTIA	CRICETIDAE	JULIOMYS
Kannabateomys_amblyonyx	0	0.8182	0	88	73	8	ANIMALIA	CHORDATA	MAMMALIA	RODENTIA	ECHIMYIDAE	KANNABATEOMYS
Kerodon_acrobata	1	0.6191	930	224	22	0	ANIMALIA	CHORDATA	MAMMALIA	RODENTIA	CAVIIDAE	KERODON
Kerodon_rupestris	0	0.8554	870	716	549	265	ANIMALIA	CHORDATA	MAMMALIA	RODENTIA	CAVIIDAE	KERODON
Kunsia_fronto	0	0.5	5	1	0	0	ANIMALIA	CHORDATA	MAMMALIA	RODENTIA	CRICETIDAE	KUNSIA
Kunsia_tomentosus	0	0.7566	832	928	874	434	ANIMALIA	CHORDATA	MAMMALIA	RODENTIA	CRICETIDAE	KUNSIA
Lagothrix_cana	0	0.7128	0	1	0	0	ANIMALIA	CHORDATA	MAMMALIA	PRIMATES	ATELIDAE	LAGOTHRIX
Leontopithecus_chrysopygus	0	0.781	0	92	38	42	ANIMALIA	CHORDATA	MAMMALIA	PRIMATES	CALLITRICHIDAE	LEONTOPITHECUS
Leontopithecus_rosalia	0	0.7027	0	35	1	10	ANIMALIA	CHORDATA	MAMMALIA	PRIMATES	CALLITRICHIDAE	LEONTOPITHECUS
Leopardus_colocolo	0	0.8886	618	64	62	6	ANIMALIA	CHORDATA	MAMMALIA	CARNIVORA	FELIDAE	LEOPARDUS
Leopardus_pardalis	0	0.9494	2721	2721	2721	2701	ANIMALIA	CHORDATA	MAMMALIA	CARNIVORA	FELIDAE	LEOPARDUS
Leopardus_tigrinus	0	0.9348	2711	2528	2661	1783	ANIMALIA	CHORDATA	MAMMALIA	CARNIVORA	FELIDAE	LEOPARDUS
Leopardus_wiedii	0	0.9593	2604	2468	2474	2466	ANIMALIA	CHORDATA	MAMMALIA	CARNIVORA	FELIDAE	LEOPARDUS
Lonchothrix_emiliae	0	0.5596	0	57	16	0	ANIMALIA	CHORDATA	MAMMALIA	RODENTIA	ECHIMYIDAE	LONCHOTHRIX
Lontra_longicaudis	0	0.9649	2305	2233	2236	2271	ANIMALIA	CHORDATA	MAMMALIA	CARNIVORA	MUSTELIDAE	LONTRA
Lutreolina_crassicaudata	0	0.8889	334	105	79	7	ANIMALIA	CHORDATA	MAMMALIA	DIDELPHIMORPHIA	DIDELPHIDAE	LUTREOLINA
Makalata_didelphoides	0	0.8674	0	594	403	188	ANIMALIA	CHORDATA	MAMMALIA	RODENTIA	ECHIMYIDAE	MAKALATA
Marmosa_constantiae	0	0.9056	1485	1672	1770	1795	ANIMALIA	CHORDATA	MAMMALIA	DIDELPHIMORPHIA	DIDELPHIDAE	MARMOSA
Marmosa_demerarae	0	0.9353	1518	1259	1085	716	ANIMALIA	CHORDATA	MAMMALIA	DIDELPHIMORPHIA	DIDELPHIDAE	MARMOSA
Marmosa_murina	0	0.9318	482	317	195	75	ANIMALIA	CHORDATA	MAMMALIA	DIDELPHIMORPHIA	DIDELPHIDAE	MARMOSA
Marmosa_paraguayanus	0	0.8642	0	75	33	12	ANIMALIA	CHORDATA	MAMMALIA	DIDELPHIMORPHIA	DIDELPHIDAE	MARMOSA
Marmosops_bishopi	0	0.8288	0	1229	1347	764	ANIMALIA	CHORDATA	MAMMALIA	DIDELPHIMORPHIA	DIDELPHIDAE	MARMOSOPS
Marmosops_incanus	0	0.7494	970	279	44	17	ANIMALIA	CHORDATA	MAMMALIA	DIDELPHIMORPHIA	DIDELPHIDAE	MARMOSOPS
Marmosops_parvidens	0	0.8047	0	12	25	0	ANIMALIA	CHORDATA	MAMMALIA	DIDELPHIMORPHIA	DIDELPHIDAE	MARMOSOPS
Marmosops_paulensis	0	0.5595	0	1	10	0	ANIMALIA	CHORDATA	MAMMALIA	DIDELPHIMORPHIA	DIDELPHIDAE	MARMOSOPS
Mazama_americana	0	0.9164	2243	1350	1322	862	ANIMALIA	CHORDATA	MAMMALIA	CETARTIODACTYLA	CERVIDAE	MAZAMA
Mazama_bororo	1	0.7576	0	56	27	18	ANIMALIA	CHORDATA	MAMMALIA	CETARTIODACTYLA	CERVIDAE	MAZAMA
Mazama_gouazoubira	0	0.9405	1941	1953	1809	1537	ANIMALIA	CHORDATA	MAMMALIA	CETARTIODACTYLA	CERVIDAE	MAZAMA
Mazama_nana	0	0.8959	0	6	4	2	ANIMALIA	CHORDATA	MAMMALIA	CETARTIODACTYLA	CERVIDAE	MAZAMA
Mazama_nemorivaga	1	0.9562	0	660	573	489	ANIMALIA	CHORDATA	MAMMALIA	ARTIODACTYLA	CERVIDAE	MAZAMA
Mesomys_hispidus	0	0.8449	0	4	0	0	ANIMALIA	CHORDATA	MAMMALIA	RODENTIA	ECHIMYIDAE	MESOMYS
Mesomys_stimulax	0	0.5315	0	8	1	0	ANIMALIA	CHORDATA	MAMMALIA	RODENTIA	ECHIMYIDAE	MESOMYS
Metachirus_nudicaudatus	0	0.884	1616	563	489	192	ANIMALIA	CHORDATA	MAMMALIA	DIDELPHIMORPHIA	DIDELPHIDAE	METACHIRUS
Mico_argentatus	1	0.6758	0	84	20	0	ANIMALIA	CHORDATA	MAMMALIA	PRIMATES	CALLITRICHIDAE	MICO
Mico_emiliae	1	0.5141	0	0	4	0	ANIMALIA	CHORDATA	MAMMALIA	PRIMATES	CALLITRICHIDAE	MICO
Mico_melanurus	1	0.8528	763	963	1517	877	ANIMALIA	CHORDATA	MAMMALIA	PRIMATES	CALLITRICHIDAE	MICO
Mico_nigriceps	1	0.694	0	3	0	0	ANIMALIA	CHORDATA	MAMMALIA	PRIMATES	CALLITRICHIDAE	MICO
Mico_rondoni	1	0.5836	0	64	11	0	ANIMALIA	CHORDATA	MAMMALIA	PRIMATES	CALLITRICHIDAE	MICO
Microakodontomys_transitorius	1	0.5	12	0	0	0	ANIMALIA	CHORDATA	MAMMALIA	RODENTIA	CRICETIDAE	MICROAKODONTOMYS
Monodelphis_americana	0	0.8919	522	706	661	661	ANIMALIA	CHORDATA	MAMMALIA	DIDELPHIMORPHIA	DIDELPHIDAE	MONODELPHIS
Monodelphis_brevicaudata	0	0.8933	0	85	53	0	ANIMALIA	CHORDATA	MAMMALIA	DIDELPHIMORPHIA	DIDELPHIDAE	MONODELPHIS
Monodelphis_dimidiata	0	0.8305	0	111	85	6	ANIMALIA	CHORDATA	MAMMALIA	DIDELPHIMORPHIA	DIDELPHIDAE	MONODELPHIS
Monodelphis_domestica	0	0.891	2639	2448	2552	2083	ANIMALIA	CHORDATA	MAMMALIA	DIDELPHIMORPHIA	DIDELPHIDAE	MONODELPHIS
Monodelphis_emiliae	0	0.7966	0	2	0	0	ANIMALIA	CHORDATA	MAMMALIA	DIDELPHIMORPHIA	DIDELPHIDAE	MONODELPHIS
Monodelphis_glirina	0	0.7913	0	80	30	0	ANIMALIA	CHORDATA	MAMMALIA	DIDELPHIMORPHIA	DIDELPHIDAE	MONODELPHIS
Monodelphis_iheringi	0	0.7025	0	188	33	7	ANIMALIA	CHORDATA	MAMMALIA	DIDELPHIMORPHIA	DIDELPHIDAE	MONODELPHIS
Monodelphis_kunsi	0	0.8135	1357	1140	1085	705	ANIMALIA	CHORDATA	MAMMALIA	DIDELPHIMORPHIA	DIDELPHIDAE	MONODELPHIS
Monodelphis_rubida	0	0.8693	890	778	457	263	ANIMALIA	CHORDATA	MAMMALIA	DIDELPHIMORPHIA	DIDELPHIDAE	MONODELPHIS
Monodelphis_scalops	0	0.7827	0	166	128	38	ANIMALIA	CHORDATA	MAMMALIA	DIDELPHIMORPHIA	DIDELPHIDAE	MONODELPHIS
Monodelphis_theresa	0	0.7359	0	37	10	0	ANIMALIA	CHORDATA	MAMMALIA	DIDELPHIMORPHIA	DIDELPHIDAE	MONODELPHIS
Monodelphis_umbristriata	0	0.8387	1053	743	424	197	ANIMALIA	CHORDATA	MAMMALIA	PRIMATES	DIDELPHIDAE	MONODELPHIS
Mus_musculus	0	0.8228	0	1100	631	418	ANIMALIA	CHORDATA	MAMMALIA	RODENTIA	MURIDAE	MUS
Mustela_africana	0	0.8912	0	89	73	0	ANIMALIA	CHORDATA	MAMMALIA	CARNIVORA	MUSTELIDAE	MUSTELA
Myocastor_coypus	0	0.9576	0	14	12	9	ANIMALIA	CHORDATA	MAMMALIA	RODENTIA	MYOCASTORIDAE	MYOCASTOR
Myoprocta_acouchy	0	0.7398	0	28	37	2	ANIMALIA	CHORDATA	MAMMALIA	RODENTIA	DASYPROCTIDAE	MYOPROCTA
Myrmecophaga_tridactyla	0	0.921	2650	2434	2441	2164	ANIMALIA	CHORDATA	MAMMALIA	PILOSA	MYRMECOPHAGIDAE	MYRMECOPHAGA
Nasua_nasua	0	0.9275	2472	1811	1577	686	ANIMALIA	CHORDATA	MAMMALIA	CARNIVORA	PROCYONIDAE	NASUA
Neacomys_guianae	0	0.6722	0	109	47	0	ANIMALIA	CHORDATA	MAMMALIA	RODENTIA	CRICETIDAE	NEACOMYS
Neacomys_paracou	1	0.7296	0	14	21	0	ANIMALIA	CHORDATA	MAMMALIA	RODENTIA	CRICETIDAE	NEACOMYS
Neacomys_spinosus	0	0.7268	275	27	24	1	ANIMALIA	CHORDATA	MAMMALIA	RODENTIA	CRICETIDAE	NEACOMYS
Necromys_lasiurus	0	0.7813	2721	2281	2115	1798	ANIMALIA	CHORDATA	MAMMALIA	RODENTIA	CRICETIDAE	NECROMYS
Necromys_lenguarum	0	0.9046	0	509	377	632	ANIMALIA	CHORDATA	MAMMALIA	RODENTIA	CRICETIDAE	NECROMYS
Nectomys_rattus	0	0.9625	1200	1172	1133	972	ANIMALIA	CHORDATA	MAMMALIA	RODENTIA	CRICETIDAE	NECTOMYS
Nectomys_squamipes	0	0.7947	1269	604	489	125	ANIMALIA	CHORDATA	MAMMALIA	RODENTIA	CRICETIDAE	NECTOMYS
Odocoileus_virginianus	0	0.7522	0	1359	1996	2492	ANIMALIA	CHORDATA	MAMMALIA	CETARTIODACTYLA	CERVIDAE	ODOCOILEUS
Oecomys_auyantepui	0	0.7134	0	7	17	0	ANIMALIA	CHORDATA	MAMMALIA	RODENTIA	CRICETIDAE	OECOMYS
Oecomys_bicolor	0	0.9377	1573	1016	926	542	ANIMALIA	CHORDATA	MAMMALIA	RODENTIA	CRICETIDAE	OECOMYS
Oecomys_catherinae	0	0.9001	2177	2164	2038	1832	ANIMALIA	CHORDATA	MAMMALIA	RODENTIA	CRICETIDAE	OECOMYS
Oecomys_cleberi	0	0.5	26	0	0	0	ANIMALIA	CHORDATA	MAMMALIA	RODENTIA	CRICETIDAE	OECOMYS
Oecomys_concolor	0	0.8462	335	216	133	13	ANIMALIA	CHORDATA	MAMMALIA	RODENTIA	CRICETIDAE	OECOMYS
Oecomys_mamorae	0	0.9423	654	859	857	946	ANIMALIA	CHORDATA	MAMMALIA	RODENTIA	CRICETIDAE	OECOMYS
Oecomys_paricola	0	0.5459	221	70	9	0	ANIMALIA	CHORDATA	MAMMALIA	RODENTIA	CRICETIDAE	OECOMYS
Oecomys_rex	0	0.7403	0	0	5	0	ANIMALIA	CHORDATA	MAMMALIA	RODENTIA	CRICETIDAE	OECOMYS
Oecomys_roberti	0	0.8834	0	352	316	80	ANIMALIA	CHORDATA	MAMMALIA	RODENTIA	CRICETIDAE	OECOMYS
Oecomys_rutilus	0	0.7535	0	35	13	0	ANIMALIA	CHORDATA	MAMMALIA	RODENTIA	CRICETIDAE	OECOMYS
Oecomys_trinitatis	0	0.8281	1804	1666	1267	975	ANIMALIA	CHORDATA	MAMMALIA	RODENTIA	CRICETIDAE	OECOMYS
Oligoryzomys_chacoensis	0	0.8549	185	161	55	66	ANIMALIA	CHORDATA	MAMMALIA	RODENTIA	CRICETIDAE	OLIGORYZOMYS
Oligoryzomys_eliurus	0	0.8694	1477	1377	1134	708	ANIMALIA	CHORDATA	MAMMALIA	RODENTIA	CRICETIDAE	OLIGORYZOMYS
Oligoryzomys_flavescens	0	0.8335	300	88	35	10	ANIMALIA	CHORDATA	MAMMALIA	RODENTIA	CRICETIDAE	OLIGORYZOMYS
Oligoryzomys_fornesi	0	0.6768	1408	1078	399	189	ANIMALIA	CHORDATA	MAMMALIA	RODENTIA	CRICETIDAE	OLIGORYZOMYS
Oligoryzomys_fulvescens	0	0.9143	0	205	97	59	ANIMALIA	CHORDATA	MAMMALIA	RODENTIA	CRICETIDAE	OLIGORYZOMYS
Oligoryzomys_microtis	0	0.871	246	180	90	17	ANIMALIA	CHORDATA	MAMMALIA	RODENTIA	CRICETIDAE	OLIGORYZOMYS
Oligoryzomys_moojeni	1	0.6154	1087	583	174	30	ANIMALIA	CHORDATA	MAMMALIA	RODENTIA	CRICETIDAE	OLIGORYZOMYS
Oligoryzomys_nigripes	0	0.797	1354	901	541	315	ANIMALIA	CHORDATA	MAMMALIA	RODENTIA	CRICETIDAE	OLIGORYZOMYS
Oligoryzomys_rupestris	1	0.5438	292	1	0	0	ANIMALIA	CHORDATA	MAMMALIA	RODENTIA	CRICETIDAE	OLIGORYZOMYS
Oligoryzomys_stramineus	1	0.8031	670	409	271	171	ANIMALIA	CHORDATA	MAMMALIA	RODENTIA	CRICETIDAE	OLIGORYZOMYS
Oxymycterus_amazonicus	1	0.5298	0	1	1	0	ANIMALIA	CHORDATA	MAMMALIA	RODENTIA	CRICETIDAE	OXYMYCTERUS
Oxymycterus_angularis	0	0.874	0	694	431	409	ANIMALIA	CHORDATA	MAMMALIA	RODENTIA	CRICETIDAE	OXYMYCTERUS
Oxymycterus_caparoae	1	0.5998	0	4	9	0	ANIMALIA	CHORDATA	MAMMALIA	RODENTIA	CRICETIDAE	OXYMYCTERUS
Oxymycterus_dasytrichus	0	0.598	0	41	11	1	ANIMALIA	CHORDATA	MAMMALIA	RODENTIA	CRICETIDAE	OXYMYCTERUS
Oxymycterus_delator	0	0.514	47	5	0	0	ANIMALIA	CHORDATA	MAMMALIA	RODENTIA	CRICETIDAE	OXYMYCTERUS
Oxymycterus_hispidus	0	0.6195	0	172	54	3	ANIMALIA	CHORDATA	MAMMALIA	RODENTIA	CRICETIDAE	OXYMYCTERUS
Oxymycterus_inca	0	0.761	0	581	636	184	ANIMALIA	CHORDATA	MAMMALIA	RODENTIA	CRICETIDAE	OXYMYCTERUS
Oxymycterus_nasutus	0	0.8097	0	1	1	0	ANIMALIA	CHORDATA	MAMMALIA	RODENTIA	CRICETIDAE	OXYMYCTERUS
Oxymycterus_quaestor	0	0.7753	0	171	129	22	ANIMALIA	CHORDATA	MAMMALIA	RODENTIA	CRICETIDAE	OXYMYCTERUS
Oxymycterus_roberti	0	0.7518	1620	1116	817	323	ANIMALIA	CHORDATA	MAMMALIA	RODENTIA	CRICETIDAE	OXYMYCTERUS
Ozotoceros_bezoarticus	0	0.7886	1981	1782	1872	895	ANIMALIA	CHORDATA	MAMMALIA	CETARTIODACTYLA	CERVIDAE	OZOTOCEROS
Panthera_onca	0	0.9107	1562	878	839	384	ANIMALIA	CHORDATA	MAMMALIA	CARNIVORA	FELIDAE	PANTHERA
Pecari_tajacu	0	0.9489	2721	2721	2721	2721	ANIMALIA	CHORDATA	MAMMALIA	CETARTIODACTYLA	TAYASSUIDAE	PECARI
Phaenomys_ferrugineus	0	0.636	0	3	5	0	ANIMALIA	CHORDATA	MAMMALIA	RODENTIA	CRICETIDAE	PHAENOMYS
Philander_frenatus	0	0.8924	246	121	76	28	ANIMALIA	CHORDATA	MAMMALIA	DIDELPHIMORPHIA	DIDELPHIDAE	PHILANDER
Philander_opossum	0	0.9226	440	184	131	4	ANIMALIA	CHORDATA	MAMMALIA	DIDELPHIMORPHIA	DIDELPHIDAE	PHILANDER
Phyllomys_blainvillii	0	0.8535	0	128	86	52	ANIMALIA	CHORDATA	MAMMALIA	RODENTIA	ECHIMYIDAE	PHYLLOMYS
Phyllomys_brasiliensis	0	0.5	14	0	0	0	ANIMALIA	CHORDATA	MAMMALIA	RODENTIA	ECHIMYIDAE	PHYLLOMYS
Phyllomys_lamarum	0	0.6735	0	1	0	0	ANIMALIA	CHORDATA	MAMMALIA	RODENTIA	ECHIMYIDAE	PHYLLOMYS
Phyllomys_medius	0	0.8006	0	29	12	5	ANIMALIA	CHORDATA	MAMMALIA	RODENTIA	ECHIMYIDAE	PHYLLOMYS
Phyllomys_nigrispinus	0	0.7334	0	85	47	16	ANIMALIA	CHORDATA	MAMMALIA	RODENTIA	ECHIMYIDAE	PHYLLOMYS
Phyllomys_pattoni	1	0.6906	0	275	107	13	ANIMALIA	CHORDATA	MAMMALIA	RODENTIA	ECHIMYIDAE	PHYLLOMYS
Pithecia_irrorata	0	0.7307	0	52	7	0	ANIMALIA	CHORDATA	MAMMALIA	PRIMATES	PITHECIIDAE	PITHECIA
Pithecia_pithecia	0	0.8321	0	3	11	0	ANIMALIA	CHORDATA	MAMMALIA	PRIMATES	PITHECIIDAE	PITHECIA
Potos_flavus	0	0.9697	2480	2324	2370	1988	ANIMALIA	CHORDATA	MAMMALIA	CARNIVORA	PROCYONIDAE	POTOS
Priodontes_maximus	0	0.9392	1770	1103	1274	712	ANIMALIA	CHORDATA	MAMMALIA	CINGULATA	DASYPODIDAE	PRIODONTES
Procyon_cancrivorus	0	0.8821	2659	2588	2586	2210	ANIMALIA	CHORDATA	MAMMALIA	CARNIVORA	PROCYONIDAE	PROCYON
Proechimys_gardneri	1	0.6533	0	12	0	0	ANIMALIA	CHORDATA	MAMMALIA	RODENTIA	ECHIMYIDAE	PROECHIMYS
Proechimys_goeldii	0	0.5515	0	38	7	0	ANIMALIA	CHORDATA	MAMMALIA	RODENTIA	ECHIMYIDAE	PROECHIMYS
Proechimys_guyannensis	0	0.7469	0	115	69	1	ANIMALIA	CHORDATA	MAMMALIA	RODENTIA	ECHIMYIDAE	PROECHIMYS
Proechimys_longicaudatus	0	0.6545	999	641	1062	197	ANIMALIA	CHORDATA	MAMMALIA	RODENTIA	ECHIMYIDAE	PROECHIMYS
Proechimys_roberti	0	0.6832	1103	579	325	141	ANIMALIA	CHORDATA	MAMMALIA	RODENTIA	ECHIMYIDAE	PROECHIMYS
Pseudalopex_gymnocercus	0	0.9347	0	22	20	25	ANIMALIA	CHORDATA	MAMMALIA	CARNIVORA	CANIDAE	PSEUDALOPEX
Pseudalopex_vetulus	0	0.8609	2364	2284	2196	1889	ANIMALIA	CHORDATA	MAMMALIA	CARNIVORA	CANIDAE	PSEUDALOPEX
Pseudoryzomys_simplex	0	0.924	2284	2401	2440	2478	ANIMALIA	CHORDATA	MAMMALIA	RODENTIA	CRICETIDAE	PSEUDORYZOMYS
Pteronura_brasiliensis	0	0.935	1686	1080	1104	747	ANIMALIA	CHORDATA	MAMMALIA	CARNIVORA	MUSTELIDAE	PTERONURA
Puma_concolor	0	0.8947	2648	2615	2651	2680	ANIMALIA	CHORDATA	MAMMALIA	CARNIVORA	FELIDAE	PUMA
Puma_yagouaroundi	0	0.9366	2720	2721	2721	2721	ANIMALIA	CHORDATA	MAMMALIA	CARNIVORA	FELIDAE	PUMA
Rhagomys_rufescens	0	0.5383	0	0	1	0	ANIMALIA	CHORDATA	MAMMALIA	RODENTIA	CRICETIDAE	RHAGOMYS
Rhipidomys_cariri	1	0.5685	0	89	2	0	ANIMALIA	CHORDATA	MAMMALIA	RODENTIA	CRICETIDAE	RHIPIDOMYS
Rhipidomys_emiliae	0	0.5286	220	47	3	0	ANIMALIA	CHORDATA	MAMMALIA	RODENTIA	CRICETIDAE	RHIPIDOMYS
Rhipidomys_macrurus	0	0.7968	2203	2025	1642	1252	ANIMALIA	CHORDATA	MAMMALIA	RODENTIA	CRICETIDAE	RHIPIDOMYS
Rhipidomys_mastacalis	0	0.6824	589	178	57	10	ANIMALIA	CHORDATA	MAMMALIA	RODENTIA	CRICETIDAE	RHIPIDOMYS
Rhipidomys_nitela	0	0.7767	0	71	28	0	ANIMALIA	CHORDATA	MAMMALIA	RODENTIA	CRICETIDAE	RHIPIDOMYS
Saguinus_imperator	0	0.7962	0	0	0	0	ANIMALIA	CHORDATA	MAMMALIA	PRIMATES	CALLITRICHIDAE	SAGUINUS
Saguinus_labiatus	0	0.849	0	13	1	0	ANIMALIA	CHORDATA	MAMMALIA	PRIMATES	CALLITRICHIDAE	SAGUINUS
Saguinus_midas	0	0.85	0	17	32	0	ANIMALIA	CHORDATA	MAMMALIA	PRIMATES	CALLITRICHIDAE	SAGUINUS
Saguinus_niger	0	0.7042	0	167	23	1	ANIMALIA	CHORDATA	MAMMALIA	PRIMATES	CALLITRICHIDAE	SAGUINUS
Saimiri_sciureus	0	0.9211	0	56	9	0	ANIMALIA	CHORDATA	MAMMALIA	PRIMATES	CEBIDAE	SAIMIRI
Saimiri_ustus	0	0.6031	0	58	13	0	ANIMALIA	CHORDATA	MAMMALIA	PRIMATES	CEBIDAE	SAIMIRI
Sciurus_aestuans	0	0.8773	2720	2274	2119	1369	ANIMALIA	CHORDATA	MAMMALIA	RODENTIA	SCIURIDAE	SCIURUS
Sciurus_gilvigularis	0	0.7099	0	109	93	3	ANIMALIA	CHORDATA	MAMMALIA	RODENTIA	SCIURIDAE	SCIURUS
Sciurus_ignitus	0	0.7511	0	68	62	4	ANIMALIA	CHORDATA	MAMMALIA	RODENTIA	SCIURIDAE	SCIURUS
Sciurus_spadiceus	0	0.8077	0	0	2	0	ANIMALIA	CHORDATA	MAMMALIA	RODENTIA	SCIURIDAE	SCIURUS
Sigmodon_alstoni	0	0.5967	0	130	93	0	ANIMALIA	CHORDATA	MAMMALIA	RODENTIA	CRICETIDAE	SIGMODON
Sooretamys_angouya	0	0.754	529	181	120	54	ANIMALIA	CHORDATA	MAMMALIA	RODENTIA	CRICETIDAE	SOORETAMYS
Speothos_venaticus	0	0.9318	2379	2132	2094	1609	ANIMALIA	CHORDATA	MAMMALIA	CARNIVORA	CANIDAE	SPEOTHOS
Sphiggurus_insidiosus	0	0.7486	0	762	466	181	ANIMALIA	CHORDATA	MAMMALIA	RODENTIA	ERETHIZONTIDAE	SPHIGGURUS
Sphiggurus_melanurus	0	0.711	0	40	1	0	ANIMALIA	CHORDATA	MAMMALIA	RODENTIA	ERETHIZONTIDAE	SPHIGGURUS
Sphiggurus_spinosus	0	0.8059	1378	871	947	314	ANIMALIA	CHORDATA	MAMMALIA	RODENTIA	ERETHIZONTIDAE	SPHIGGURUS
Sphiggurus_villosus	0	0.7187	0	103	25	3	ANIMALIA	CHORDATA	MAMMALIA	RODENTIA	ERETHIZONTIDAE	SPHIGGURUS
Sylvilagus_brasiliensis	0	0.6808	2690	2084	1664	698	ANIMALIA	CHORDATA	MAMMALIA	LAGOMORPHA	LEPORIDAE	SYLVILAGUS
Tamandua_tetradactyla	0	0.9106	2688	2568	2529	1964	ANIMALIA	CHORDATA	MAMMALIA	PILOSA	MYRMECOPHAGIDAE	TAMANDUA
Tapirus_terrestris	0	0.8827	2669	2228	2174	1039	ANIMALIA	CHORDATA	MAMMALIA	PERISSODACTYLA	TAPIRIDAE	TAPIRUS
Tayassu_pecari	0	0.8829	2718	2299	2179	1083	ANIMALIA	CHORDATA	MAMMALIA	CETARTIODACTYLA	TAYASSUIDAE	TAYASSU
Thalpomys_cerradensis	0	0.6664	1377	924	640	191	ANIMALIA	CHORDATA	MAMMALIA	RODENTIA	CRICETIDAE	THALPOMYS
Thalpomys_lasiotis	0	0.5747	1396	586	243	83	ANIMALIA	CHORDATA	MAMMALIA	RODENTIA	CRICETIDAE	THALPOMYS
Thaptomys_nigrita	0	0.7354	0	93	46	8	ANIMALIA	CHORDATA	MAMMALIA	RODENTIA	CRICETIDAE	THAPTOMYS
Thrichomys_apereoides	0	0.8668	947	736	516	441	ANIMALIA	CHORDATA	MAMMALIA	RODENTIA	ECHIMYIDAE	THRICHOMYS
Thrichomys_inermis	0	0.7434	66	17	0	0	ANIMALIA	CHORDATA	MAMMALIA	RODENTIA	ECHIMYIDAE	THRICHOMYS
Thrichomys_pachyurus	1	0.9196	226	466	462	562	ANIMALIA	CHORDATA	MAMMALIA	RODENTIA	ECHIMYIDAE	THRICHOMYS
Thylamys_karimii	0	0.7794	1284	576	666	19	ANIMALIA	CHORDATA	MAMMALIA	DIDELPHIMORPHIA	DIDELPHIDAE	THYLAMYS
Thylamys_macrurus	0	0.865	45	2	25	0	ANIMALIA	CHORDATA	MAMMALIA	DIDELPHIMORPHIA	DIDELPHIDAE	THYLAMYS
Thylamys_velutinus	1	0.9249	1481	1586	1374	839	ANIMALIA	CHORDATA	MAMMALIA	DIDELPHIMORPHIA	DIDELPHIDAE	THYLAMYS
Tolypeutes_matacus	0	0.9576	136	214	144	242	ANIMALIA	CHORDATA	MAMMALIA	CINGULATA	DASYPODIDAE	TOLYPEUTES
Tolypeutes_tricinctus	0	0.7516	723	462	205	70	ANIMALIA	CHORDATA	MAMMALIA	CINGULATA	DASYPODIDAE	TOLYPEUTES
Toromys_grandis	0	0.7196	0	24	3	0	ANIMALIA	CHORDATA	MAMMALIA	RODENTIA	ECHIMYIDAE	TOROMYS
Trinomys_dimidiatus	0	0.602	0	35	43	0	ANIMALIA	CHORDATA	MAMMALIA	RODENTIA	ECHIMYIDAE	TRINOMYS
Trinomys_eliasi	1	0.5594	0	2	0	0	ANIMALIA	CHORDATA	MAMMALIA	RODENTIA	ECHIMYIDAE	TRINOMYS
Trinomys_gratiosus	0	0.7683	0	62	52	0	ANIMALIA	CHORDATA	MAMMALIA	RODENTIA	ECHIMYIDAE	TRINOMYS
Trinomys_iheringi	0	0.7841	0	621	314	81	ANIMALIA	CHORDATA	MAMMALIA	RODENTIA	ECHIMYIDAE	TRINOMYS
Trinomys_moojeni	1	0.5147	12	2	0	0	ANIMALIA	CHORDATA	MAMMALIA	RODENTIA	ECHIMYIDAE	TRINOMYS
Trinomys_myosuros	0	0.7184	0	104	22	1	ANIMALIA	CHORDATA	MAMMALIA	RODENTIA	ECHIMYIDAE	TRINOMYS
Trinomys_paratus	0	0.7109	0	0	0	0	ANIMALIA	CHORDATA	MAMMALIA	RODENTIA	ECHIMYIDAE	TRINOMYS
Trinomys_setosus	0	0.8133	213	249	108	46	ANIMALIA	CHORDATA	MAMMALIA	RODENTIA	ECHIMYIDAE	TRINOMYS
Wiedomys_cerradensis	1	0.5	27	0	0	0	ANIMALIA	CHORDATA	MAMMALIA	RODENTIA	CRICETIDAE	WIEDOMYS
Wiedomys_pyrrhorhinos	0	0.891	415	298	331	56	ANIMALIA	CHORDATA	MAMMALIA	RODENTIA	CRICETIDAE	WIEDOMYS
Zygodontomys_brevicauda	0	0.8477	0	412	285	102	ANIMALIA	CHORDATA	MAMMALIA	RODENTIA	CRICETIDAE	ZYGODONTOMYS
