# Supplementary material
Source: Elsevier journal article supplement (https://www.sciencedirect.com/science/article/pii/S2530064418301378)
Supplement: mmc2 [file S2530064418301378:mmc2.docx]

**Online Appendix: Climate Change will drive species loss and biotic homogenization in a Biodiversity Hotspot**

Table of Content:

[1. Low concentration of greenhouse gases: 2](#_Toc425262609)

[Figure A1. Taxonomic, phylogenetic, and functional alpha diversities and temporal turnovers 2](#_Toc425262610)

[Figure A2. Taxonomic, phylogenetic, and functional turnovers 3](#_Toc425262612)

[Table A1. Numbers of expected immigrants and extinctions 3](#_Toc425262612)

[2. High concentration of greenhouse gases: 4](#_Toc425262615)

[Figure A3. Taxonomic, phylogenetic, and functional alpha diversities and temporal turnovers 4](#_Toc425262616)

[Figure A4. Taxonomic, phylogenetic, and functional turnovers 5](#_Toc425262618)

[Table A2. Numbers of expected immigrants and extinctions 5](#_Toc425262612)

# Low concentration of greenhouse gases:

**Figure A1.** On the left side, maps indicating the present values and the percentages of increase or decrease (future-present) in values of taxonomic alpha diversity (“a” and “b” for richness), and present and future values of phylogenetic (“e” and “f” for z of MPD), and functional (“i” and “j” for z of MFD) alpha diversities. On the right side, maps indicating the temporal beta diversity and percentage of turnover (out of total beta diversity) of taxonomic (“c” and “d”), phylogenetic (“g” and “h”), and functional (“k” and “l”) beta diversities between present time and the near future. Future values were calculated for the year of 2070 under a scenario of low concentration of greenhouse gases (RCP 2.6).

**Figure A2.** Maps indicating the present values and the percentage of turnover (out of total beta), and the increase or decrease in both, of taxonomic (“a”, “b”, “c”, and “d”), phylogenetic (“e”, “f”, “g”, and “h”), and functional (“i”, “j”, “k” and “l”) beta diversities between present time and the year of 2070 under a scenario of low concentration of greenhouse gases (RCP 2.6).

**Table A1.** Numbers and percentages, for each IUCN category, of potential regionally extinct and immigrant species expected in the Brazilian Cerrado for the year of 2070 under a scenario of low concentration of greenhouse gases (RCP 2.6).

| Species | DD | LC | NT | VU | EN | CR |
| --- | --- | --- | --- | --- | --- | --- |
| Extinctions | 2 (50%) | 0 | 0 | 0 | 2 (50%) | 0 |
| Immigrants | 18 (12.16%) | 101 (68.24%) | 3 (2.03%) | 11 (7.43%) | 10 (0.07%) | 5 (0.03%) |

# High concentration of greenhouse gases:

**Figure A3.** On the left side, maps indicating the present values and the percentages of increase or decrease (future-present) in values of taxonomic alpha diversity (“a” and “b” for richness), and present and future values of phylogenetic (“e” and “f” for z of MPD), and functional (“i” and “j” for z of MFD) alpha diversities. On the right side, maps indicating the temporal beta diversity and percentage of turnover (out of total beta diversity) of taxonomic (“c” and “d”), phylogenetic (“g” and “h”), and functional (“k” and “l”) beta diversities between present time and the near future. Future values were calculated for the year of 2070 under a scenario of low concentration of greenhouse gases (RCP 8.5).

**Figure A4.** Maps indicating the present values and the percentage of turnover (out of total beta), and the increase or decrease in both, of taxonomic (“a”, “b”, “c”, and “d”), phylogenetic (“e”, “f”, “g”, and “h”), and functional (“i”, “j”, “k” and “l”) beta diversities between present time and the year of 2070 under a scenario of low concentration of greenhouse gases (RCP 8.5).

**Table A3.** Numbers and percentages, for each IUCN category, of potential regionally extinct and immigrant species expected in the Brazilian Cerrado for the year of 2070 under a scenario of high concentration of greenhouse gases (RCP 8.5).

| Species | DD | LC | NT | VU | EN | CR |
| --- | --- | --- | --- | --- | --- | --- |
| Extinctions | 8 (44.44%) | 5 (27.78%) | 1 (5.56%) | 0 | 4 (22.22%) | 0 |
| Immigrants | 9 (13.43%) | 48 (71.64%) | 2 (2.98%) | 2 (2.98%) | 3 (4.48%) | 3 (4.48%) |
