# Supplementary material
Source: Elsevier journal article supplement (https://www.sciencedirect.com/science/article/pii/S2530064418301378)
Supplement: mmc3 [file S2530064418301378:mmc3.docx]

**Online Appendix: Climate Change will drive species loss and biotic homogenization in a Biodiversity Hotspot**

Future - present taxonomic alpha diversity

**Figure A1.** Taxonomic alpha diversity (richness) from low concentration of greenhouse gases projection (RCP 2.6) - present taxonomic diversity.

Future - present taxonomic alpha diversity

**Figure A2.** Taxonomic alpha diversity (richness) from medium concentration of greenhouse gases projection (RCP 6.0) - present taxonomic diversity.

Future - present taxonomic alpha diversity

**Figure A3.** Taxonomic alpha diversity (richness) from high concentration of greenhouse gases projection (RCP 8.5) - present taxonomic diversity.

Future - present phylogenetic alpha diversity

**Figure A4.** Phylogenetic alpha diversity from low concentration of greenhouse gases projection (RCP 2.6) - present phylogenetic alpha diversity.

Future - present phylogenetic alpha diversity

**Figure A5.** Phylogenetic alpha diversity from medium concentration of greenhouse gases projection (RCP 6.0) - present phylogenetic alpha diversity.

Future - present phylogenetic alpha diversity

**Figure A6.** Phylogenetic alpha diversity from high concentration of greenhouse gases projection (RCP 8.5) - present phylogenetic alpha diversity.

Future - present functional alpha diversity

**Figure A7.** Functional alpha diversity from low concentration of greenhouse gases projection (RCP 2.6) - present functional alpha diversity.

Future - present functional alpha diversity

**Figure A8.** Functional alpha diversity from medium concentration of greenhouse gases projection (RCP 6.0) - present functional alpha diversity.

Future - present functional alpha diversity

**Figure A9.** Functional alpha diversity from high concentration of greenhouse gases projection (RCP 8.5) - present functional alpha diversity.

Future - present taxonomic beta diversity

**Figure A10.** Taxonomic beta diversity from low concentration of greenhouse gases projection (RCP 2.6) - present taxonomic beta diversity.

Future - present taxonomic beta diversity

**Figure A11.** Taxonomic beta diversity from medium concentration of greenhouse gases projection (RCP 6.0) - present taxonomic beta diversity.

Future - present taxonomic beta diversity

**Figure A12.** Taxonomic beta diversity from high concentration of greenhouse gases projection (RCP 8.5) - present taxonomic beta diversity.

Future - present phylogenetic beta diversity

**Figure A13.** Phylogenetic beta diversity from low concentration of greenhouse gases projection (RCP 2.6) - present phylogenetic beta diversity.

Future - present phylogenetic beta diversity

**Figure A14.** Phylogenetic beta diversity from medium concentration of greenhouse gases projection (RCP 6.0) - present phylogenetic beta diversity.

Future - present phylogenetic beta diversity

**Figure A15.** Phylogenetic beta diversity from high concentration of greenhouse gases projection (RCP 8.5) - present phylogenetic beta diversity.

Future - present functional beta diversity

**Figure A16.** Functional beta diversity from low concentration of greenhouse gases projection (RCP 2.6) - present functional beta diversity.

Future - present functional beta diversity

**Figure A17.** Functional beta diversity from medium concentration of greenhouse gases projection (RCP 6.0) - present functional beta diversity.

Future - present functional beta diversity

**Figure A18.** Functional beta diversity from medium concentration of greenhouse gases projection (RCP 8.5) - present functional beta diversity.
